# Supplementary material for: Ceftaroline Fosamil for Treatment of Pediatric Complicated Skin and Soft Tissue Infections and Community-Acquired Pneumonia
Source: PubMed Central journal article supplement — Paediatr Drugs. 2021 Aug 31;23(6):549–63. doi: 10.1007/s40272-021-00468-w (PMC8563558; doi:10.1007/s40272-021-00468-w), 2021-08-31
Supplement: 40272_2021_468_MOESM1_ESM.pdf [file 40272_2021_468_MOESM1_ESM.pdf]

## **Supplementary Materials**

# **Ceftaroline Fosamil for Treatment of Pediatric Complicated Skin and Soft Tissue Infections and Community-Acquired Pneumonia**

**Susanna Esposito<sup>1</sup>, Timothy J. Carrothers<sup>2</sup>, Todd Riccobene<sup>2</sup>, Gregory G.  
Stone<sup>3</sup>, Michal Kantecki<sup>4</sup>**

*<sup>1</sup>Pediatric Clinic, Pietro Barilla Children's Hospital, University of Parma, Parma, Italy;*

*<sup>2</sup>AbbVie, Madison, NJ, USA; <sup>3</sup>Pfizer, Groton, CT, USA; <sup>4</sup>Pfizer, Paris, France*

**Corresponding author:** Professor Susanna Esposito, Pediatric Clinic, Pietro Barilla  
Children's Hospital, University of Parma Building 15, Via Gramsci 14, 43126 Parma,  
Italy

Tel: +39 0521 903524; E-mail: [susannamariaroberta.esposito@unipr.it](mailto:susannamariaroberta.esposito@unipr.it)

**Pediatric Drugs, 2021**

**Supplementary Table S1.** Antibiotics with activity against Gram-positive organisms and approval for use in children

| <b>Drug</b>                | <b>Europe</b>         | <b>United States</b>                              |
|----------------------------|-----------------------|---------------------------------------------------|
| Ceftaroline fosamil [1, 2] | All ages              | All ages (ABSSSI only for patients <2 months old) |
| Clindamycin [3, 4]         | All ages <sup>a</sup> | All ages                                          |
| Daptomycin [5, 6]          | Age ≥1 year           | Age ≥1 year                                       |
| Levofloxacin [7, 8]        | Adult only            | Adult only                                        |
| Linezolid [9, 10]          | Adult only            | All ages                                          |
| Teicoplanin [11]           | All ages              | Not available                                     |
| Tigecycline [12, 13]       | ≥8 years of age       | Adult only                                        |
| Vancomycin [14, 15]        | All ages              | All ages                                          |
| Dalbavancin [16, 17]       | Adult only            | Adult only                                        |
| Tedizolid [18, 19]         | Adult only            | Adult only                                        |
| Oritavancin [20, 21]       | Adult only            | Adult only                                        |

ABSSSI acute bacterial skin and skin structure infections; MRSA methicillin-resistant *Staphylococcus aureus*

<sup>a</sup>Not recommended if MRSA is suspected/confirmed.

**Supplementary Table S2. Ceftaroline fosamil approved pediatric and adult dose regimens**

|                                                                                                                                                           | Age and renal function group                                                              | Ceftaroline fosamil dose (infusion duration) and administration frequency |                                                            |                                                            |                                           |
|-----------------------------------------------------------------------------------------------------------------------------------------------------------|-------------------------------------------------------------------------------------------|---------------------------------------------------------------------------|------------------------------------------------------------|------------------------------------------------------------|-------------------------------------------|
|                                                                                                                                                           |                                                                                           | Normal/mild impairment (CrCl >50 mL/min)                                  | Moderate impairment (>30 to ≤50 mL/min)                    | Severe impairment (≥15 to ≤30 mL/min)                      | ESRD, including hemodialysis (<15 mL/min) |
| <b>Standard dose<sup>a,b</sup></b><br><br>cSSTI/ABSSSI ( <i>S. aureus</i> with an MIC ≤1 mg/L to ceftaroline)<br><br>CAP/CABP                             | Adults                                                                                    | 600 mg (5–60 min) q12h                                                    | 400 mg (5–60 min) q12h                                     | 300 mg (5–60 min) q12h <sup>c</sup>                        | 200 mg (5–60 min) q12h <sup>c</sup>       |
|                                                                                                                                                           | Adolescents 12 to <18 years old, with bodyweight ≥33 kg                                   | 600 mg (5–60 min) q12h or 400 mg q8h (5–60 min)                           | 400 mg (5–60 min) q12h <sup>c</sup>                        | 300 mg (5–60 min) q12h <sup>c</sup>                        | 200 mg (5–60 min) q12h <sup>c</sup>       |
|                                                                                                                                                           | Adolescents 12 to <18 years old, with bodyweight <33 kg; and children ≥2 to <12 years old | 12 mg/kg to a maximum of 400 mg (5–60 min) q8h                            | 8 mg/kg to a maximum of 400 mg (5–60 min) q8h <sup>c</sup> | 6 mg/kg to a maximum of 400 mg (5–60 min) q8h <sup>c</sup> | –                                         |
|                                                                                                                                                           | Infants ≥2 months to <2 years old                                                         | 8 mg/kg to a maximum of 300 mg (5–60 min) q8h                             | –                                                          | –                                                          | –                                         |
|                                                                                                                                                           | Neonates from birth to <2 months old <sup>d</sup>                                         | 6 mg/kg to a maximum of 200 mg (30–60 min) <sup>e</sup> q8h               | –                                                          | –                                                          | –                                         |
| <b>High dose<sup>b,c</sup></b><br><br>cSSTI confirmed or suspected to be caused by <i>S. aureus</i> with an MIC = 2 or 4 mg/L to ceftaroline <sup>f</sup> | Adults                                                                                    | 600 mg (120 min) q8h                                                      | 400 mg (120 min) q8h                                       | 300 mg (120 min) q8h                                       | 200 mg (120 min) q8h                      |
|                                                                                                                                                           | Children and adolescents ≥2 to <18 years old                                              | 12 mg/kg to a maximum of 600 mg (120 min) q8h                             | 10 mg/kg to a maximum of 400 mg (120 min) q8h              | 8 mg/kg to a maximum of 400 mg (120 min) q8h               | –                                         |
|                                                                                                                                                           | Infants ≥2 months to <2 years old                                                         | 10 mg/kg to a maximum of 400 mg (120 min) q8h                             | –                                                          | –                                                          | –                                         |

<sup>a</sup>For patients with supranormal renal clearance receiving the standard dose, an infusion time of 60 min may be preferable.

<sup>b</sup>Infusion times of less than 60 min, neonatal and high dose recommendations are based on PK and PD analyses only.

<sup>c</sup>Not approved in the US.

<sup>d</sup>Only approved for neonates with ABSSSI in the US (gestational age 34 weeks and older and postnatal age 12 days and older).

<sup>e</sup>60 min infusion recommended for neonates in Europe (30–60 min infusion approved in the US only).

<sup>f</sup>For treatment of *S. aureus* for which the ceftaroline MIC is  $\leq 1$  mg/L, the standard dose is recommended.

*ABSSSI* acute bacterial skin and skin structure infection; *CABP* community-acquired bacterial pneumonia; *CAP* community-acquired pneumonia; *cSSTI* complicated skin and soft tissue infection; *ESRD* end-stage renal disease; *IV* intravenous; *MIC* minimum inhibitory concentration; *CrCL* creatinine clearance calculated using the Cockcroft–Gault formula [22] for adults and Schwartz bedside formula (in mL/min/1.73 m<sup>2</sup>) [23] for pediatric patients; *q8h* every 8 h; *q12h* every 12 h.

## Supplementary References

1. Pfizer. Zinforo 600 mg powder for concentrate for solution for infusion: summary of product characteristics. 2020.  
[https://www.ema.europa.eu/en/documents/product-information/zinforo-epar-product-information\\_en.pdf](https://www.ema.europa.eu/en/documents/product-information/zinforo-epar-product-information_en.pdf). Accessed 28 April 2021.
2. Allergan. TEFLARO™ (ceftaroline fosamil) injection for intravenous (IV) use. 2020. [https://www.allergan.com/assets/pdf/teflaro\\_pi](https://www.allergan.com/assets/pdf/teflaro_pi). Accessed 28 April 2021.
3. ADVANZ Pharma. Summary of Product Characteristics: Clindamycin 150mg/ml Solution for Injection or Infusion. 2018.  
<https://www.medicines.org.uk/emc/product/3350/smpc#companyDetails>. Accessed 6 May, 2020.
4. Hospira. Cleocin phosphate®. 2020.  
[https://www.accessdata.fda.gov/drugsatfda\\_docs/label/2020/050441s083,050639s041lbl.pdf](https://www.accessdata.fda.gov/drugsatfda_docs/label/2020/050441s083,050639s041lbl.pdf). Accessed 6 May, 2020.
5. Merck Sharp & Dohme Limited. Summary of product characteristics: Cubicin 500 mg powder for solution for injection or infusion. 2018.  
<https://www.medicines.org.uk/emc/product/8124/smpc>. Accessed 6 May, 2020.
6. Merck Sharp & Dohme. CUBICIN® (daptomycin for injection), for intravenous use. 2018.  
[https://www.accessdata.fda.gov/drugsatfda\\_docs/label/2018/021572s061lbl.pdf](https://www.accessdata.fda.gov/drugsatfda_docs/label/2018/021572s061lbl.pdf). Accessed 6 May, 2020.
7. Hospira. Levofloxacin injection, solution. 2019.  
<https://www.medicines.org.uk/emc/product/4782/smpc>. Accessed 6 May, 2020.

8. Janssen Pharmaceuticals. LEVAQUIN® Tablets, Solution and Injection. 2016. [https://www.accessdata.fda.gov/drugsatfda\\_docs/label/2016/020634s067,020635s073,021721s034lbl.pdf](https://www.accessdata.fda.gov/drugsatfda_docs/label/2016/020634s067,020635s073,021721s034lbl.pdf). Accessed 6 May, 2020.
9. Pfizer. Summary of product characteristics: Zyvox 600 mg film-coated tablets. 2018. <https://www.medicines.org.uk/emc/product/1688/smpc>. Accessed 6 May, 2020.
10. Pfizer. ZYVOX® (linezolid) injection, tablets and oral suspension. 2019. <http://labeling.pfizer.com/ShowLabeling.aspx?format=PDF&id=649>. Accessed 6 May, 2020.
11. Sanofi. Summary of product characteristics: Targocid 400 mg powder for solution for injection/infusion or oral solution. 2019. <https://www.medicines.org.uk/emc/product/2927/smpc>. Accessed 6 May, 2020.
12. Pfizer. Summary of product characteristics: Tygacil 50 mg powder for solution for infusion. 2019. <https://www.medicines.org.uk/emc/product/200/smpc>. Accessed 6 May, 2020.
13. Pfizer. TYGACIL® (tigecycline) for injection, for intravenous use 2016. [https://www.accessdata.fda.gov/drugsatfda\\_docs/label/2016/021821s039lbl.pdf](https://www.accessdata.fda.gov/drugsatfda_docs/label/2016/021821s039lbl.pdf). Accessed
14. Hospira. Summary of product characteristics: Vancomycin hydrochloride 500 mg and 1 g powder for concentrate for infusion. 2017. <https://www.medicines.org.uk/emc/product/386/smpc>. Accessed 6 May, 2020.
15. Hospira. Vancomycin hydrochloride for injection, USP. 2011. [https://www.accessdata.fda.gov/drugsatfda\\_docs/label/2011/062911s035lbl.pdf](https://www.accessdata.fda.gov/drugsatfda_docs/label/2011/062911s035lbl.pdf). Accessed 6 May, 2020.
16. Correvio. Summary of Product Characteristics: Xydalba 500 mg powder for concentrate for solution for infusion. 2019.

- <https://www.medicines.org.uk/emc/product/2270/smpc>. Accessed 6 May, 2020.
17. AbbVie. DALVANCE (dalbavancin) for injection, for intravenous use. 2018. [https://www.accessdata.fda.gov/drugsatfda\\_docs/label/2018/021883s007lbl.pdf](https://www.accessdata.fda.gov/drugsatfda_docs/label/2018/021883s007lbl.pdf). Accessed 6 May, 2020.
  18. Merck Sharp & Dohme. Summary of product characteristics: Sivextro 200 mg powder for concentrate for solution for infusion. 2020. <https://www.medicines.org.uk/emc/product/1921/smpc>. Accessed 6 May, 2020.
  19. Merck & Co. Inc. SIVEXTRO (tedizolid phosphate) for injection, for intravenous use. 2019. [https://www.accessdata.fda.gov/drugsatfda\\_docs/label/2019/205435s011,205436s006lbl.pdf](https://www.accessdata.fda.gov/drugsatfda_docs/label/2019/205435s011,205436s006lbl.pdf). Accessed 6 May, 2020.
  20. Menarini. Summary of Product Characteristics: Orbactiv 400 mg powder for concentrate for solution for infusion. 2020. [https://www.ema.europa.eu/documents/product-information/orbactiv-epar-product-information\\_en.pdf](https://www.ema.europa.eu/documents/product-information/orbactiv-epar-product-information_en.pdf). Accessed 6 May, 2020.
  21. Melinta Therapeutics Inc. ORBACTIV® (oritavancin) for injection, for intravenous use. 2019. [https://www.accessdata.fda.gov/drugsatfda\\_docs/label/2019/206334s005lbl.pdf](https://www.accessdata.fda.gov/drugsatfda_docs/label/2019/206334s005lbl.pdf). Accessed 6 May, 2020.
  22. Cockcroft DW, Gault MH. Prediction of creatinine clearance from serum creatinine. *Nephron*. 1976;16:31-41.
  23. Schwartz GJ, Munoz A, Schneider MF, Mak RH, Kaskel F, Warady BA, et al. New equations to estimate GFR in children with CKD. *J Am Soc Nephrol*. 2009;20:629-37.
